# Supplementary material for: Diagnostic Utility of TSSC3 and RB1 Immunohistochemistry in Hydatidiform Mole
Source: MDPI journal article supplement (doi:10.3390/ijms24119656), 2023-06-02
Supplement: s1 [file s1]

**Table S1:** List of paternally-imprinted, maternally-expressed genes (Source:

<https://www.geneimprint.com/site/genes-by-species.Homo+sapiens.imprinted-M> and

<https://www.proteinatlas.org/>)

| Gene    | Gene description                                                     | Aliases                                    | Location    | Protein expression and tissue localisation                                                                               |
|---------|----------------------------------------------------------------------|--------------------------------------------|-------------|--------------------------------------------------------------------------------------------------------------------------|
| TP73    | Tumour protein p73                                                   | P73                                        | 1p36.3      | Nuclear expression in a subset of glandular cells in the fallopian tube, squamous epithelium and respiratory epithelium. |
| ADTRP   | Androgen dependent TFPI regulating protein                           | AIG1L, C6orf105, dJ413H6.1                 | 6p24.1 AS   | NA                                                                                                                       |
| SLC22A2 | Solute carrier family 22 member 2                                    | OCT2, MGC32628                             | 6q26 AS     | Distinct membranous and cytoplasmic expression in renal tubules.                                                         |
| SLC22A3 | Solute carrier family 22-member 3                                    | EMT, EMTH, OCT3                            | 6q26-q27    | Cytoplasmic expression in most tissues.                                                                                  |
| HOXA4   | Homeobox A4                                                          | HOX1, HOX1D                                | 7p15-p14 AS | General nuclear expression.                                                                                              |
| MAGI2   | Membrane associated guanylate kinase, WW and PDZ domain containing 2 | AIP1, AIP-1, ARIP1, SSCAM, MAGI-2, ACVRIP1 | 7q21 AS     | Cytoplasmic and nuclear expression in several tissues                                                                    |
| PPP1R9A | Protein phosphatase 1 regulatory subunit 9A                          | NRB1, NRBI, FLJ20068, KIAA1222, Neurabin-I | 7q21.3      | Membranous and cytoplasmic expression in most tissues                                                                    |
| DLX5    | Distal-less homeobox 5                                               | -                                          | 7q22 AS     | Nuclear expression in most tissues                                                                                       |
| TFPI2   | Tissue factor pathway inhibitor 2                                    | PP5, REF1, TFPI-2, FLJ21164                | 7q22 AS     | Selective cytoplasmic expression in placental trophoblasts.                                                              |
| CPA4    | Carboxypeptidase A4                                                  | CPA3                                       | 7q32        | NA                                                                                                                       |
| KLF14   | Kruppel-like factor 14                                               | BTEB5                                      | 7q32.3 AS   | NA                                                                                                                       |
| SVOPL   | SVOP like                                                            | -                                          | 7q34 AS     | NA                                                                                                                       |

|            |                                                        |                                                                                              |             |                                                                                           |
|------------|--------------------------------------------------------|----------------------------------------------------------------------------------------------|-------------|-------------------------------------------------------------------------------------------|
| KCNK9      | Potassium two pore domain channel subfamily K member 9 | KT3.2, TASK3, K2p9.1, TASK-3, MGC138268, MGC138270                                           | 8q24.3 AS   | NA                                                                                        |
| OSBPL5     | Oxysterol binding protein like 5                       | ORP5, OBPH1, FLJ42929                                                                        | 11p15.4 AS  | General cytoplasmic expression with a granular pattern.                                   |
| KCNQ1D N   | KCNQ1 downstream neighbour                             | BWRT, HSA404617                                                                              | 11p15.4     | NA                                                                                        |
| H19        | H19 Imprinted Maternally Expressed Transcript          | ASM, BWS, ASM1, MGC4485, PRO2605, D11S813E                                                   | 11p15.5 AS  | NA                                                                                        |
| SLC22A18   | Solute carrier family 22-member 18                     | HET, ITM, BWR1A, IMPT1, TSSC5, ORCTL2, BWSCR1A, SLC22A1L, p45-BWR1A, DKFZp667A184            | 11p15.5     | Luminal membranous expression in several tissues, most abundant in small intestines.      |
| CDKN1C     | Cyclin dependent kinase inhibitor 1C                   | BWS, WBS, p57, BWCR, KIP2                                                                    | 11p15.5 AS  | Nuclear expression in several tissues.                                                    |
| PHLDA2     | Pleckstrin homology like domain family A member 2      | IPL, BRW1C, BWR1C, HLDA2, TSSC3                                                              | 11p15.5 AS  | NA                                                                                        |
| KCNQ1      | Potassium voltage-gated channel subfamily Q member 1   | LQT, RWS, WRS, LQT1, SQT2, ATFB1, ATFB3, JLNS1, KCNA8, KCNA9, Kv1.9, Kv7.1, KVLQT1, FLJ26167 | 11p15.5     | Cytoplasmic and membranous expression mainly in adrenal gland, thyroid gland and stomach. |
| ANO1       | Anoctamin 1                                            | DOG1, TAOS2, ORAOV2, TMEM16A                                                                 | 11q13.3     | Cytoplasmic and membranous expression in several tissues.                                 |
| NTM        | Neurotrimin                                            | HNT, NTRI, IGLON2                                                                            | 11q25       | High expression in CNS                                                                    |
| RBP5       | Retinol binding protein 5                              | CRBP3, CRBP III, CRBP-III                                                                    | 12p13.31 AS | Cytoplasmic expression at variable levels in all tissues.                                 |
| ATP5F1EP 2 | ATP Synthase F1 Subunit Epsilon                        | ATP5EP2                                                                                      | 13q12.2     | NA                                                                                        |

| Pseudogene 2 |                                                  |                                                                |                |                                                                   |
|--------------|--------------------------------------------------|----------------------------------------------------------------|----------------|-------------------------------------------------------------------|
| RB1          | RB transcriptional corepressor 1                 | RB, pRb, OSRC, pp110, p105-Rb                                  | 13q14.2        | Nuclear expression in most tissues, including retina.             |
| SMOC1        | SPARC related modular calcium binding 1          | OAS                                                            | 14q24.2        | Cytoplasmic expression in testis.                                 |
| MEG3         | Maternally Expressed 3                           | GTL2, FP504, prebp1, PRO0518, PRO2160, FLJ31163, FLJ42589      | 14q32          | NA                                                                |
| MEG8         | Maternally Expressed 8                           | Bsr, Irm, Rian, SNHG23, SNHG24, lnc-MGC, LINC00024, NCRNA00024 | 14q32.2-q32.31 | NA                                                                |
| DIO3OS       | DIO3 Opposite Strand Upstream RNA                | DIO3-OS, DIO3-AS1, C14orf134, NCRNA00041                       | 14q32.31 AS    | NA                                                                |
| SNORD113-1   | small nucleolar RNA, C/D box 113-1               | 14q(I-1)                                                       | 14q32.31       | NA                                                                |
| SNORD114-1   | small nucleolar RNA, C/D box 114-1               | 14q(II-1)                                                      | 14q32.31       | NA                                                                |
| UBE3A        | Ubiquitin protein ligase E3A                     | AS, ANCR, E6-AP, HPVE6A, EPVE6AP, FLJ26981                     | 15q11-q13 AS   | Mainly cytoplasmic but also nuclear expression in all tissues.    |
| ATP10A       | ATPase phospholipid transporting 10A (putative)  | ATPVA, ATPVC, ATP10C, KIAA0566                                 | 15q11.2 AS     | NA                                                                |
| ZNF597       | Zinc finger protein 597                          | -                                                              | 16p13.3 AS     | Low nuclear expression in a few tissues, most abundant in testis. |
| NAA60        | NAA60                                            | HAT4, NAT15                                                    | 16p13.3        | Cytoplasmic expression in most tissues.                           |
| TCEB3C       | transcription elongation factor B polypeptide 3C | HsT829, TCEB3L2, Elongin A3                                    | 18q21.1 AS     | NA                                                                |
| PARD6G       | Par-6 family cell                                | PAR-6G,                                                        | 18q23 AS       | NA                                                                |

|       |                                            |                                          |          |    |
|-------|--------------------------------------------|------------------------------------------|----------|----|
|       | polarity regulator<br>gamma                | PAR6gamma                                |          |    |
| NLRP2 | NLR family pyrin<br>domain containing<br>2 | NBS1, PAN1,<br>NALP2, PYPAF2,<br>CLR19.9 | 19q13.42 | NA |

NA – Not available

**Table S2:** Expression of TSSC3 and RB1 in CT cells of CM, PM and NMA

| No. | Sample No. | $\beta$ hCG (mIU/mL) | Diagnosis | TSSC3     |     | RB1       |     |
|-----|------------|----------------------|-----------|-----------|-----|-----------|-----|
|     |            |                      |           | Intensity | %   | Intensity | %   |
| 1   | CM001      | 170,624              | CM        | -         | 0   | 1+        | 30  |
| 2   | CM004      | 583,933              | CM        | 1+        | 100 | 1+        | 30  |
| 3   | CM005      | 170,000+             | CM        | -         | 0   | 1+        | 30  |
| 4   | CM006      | NA                   | CM        | -         | 0   | 2+        | 20  |
| 5   | CM007      | 67,899.50            | CM        | -         | 0   | -         | 0   |
| 6   | CM008      | 186,596              | CM        | -         | 0   | 2+        | 30  |
| 7   | CM009      | 542,643              | CM        | -         | 0   | 2+        | 30  |
| 8   | CM010      | 670,773.80           | CM        | -         | 0   | 2+        | 10  |
| 9   | CM011      | 1,000,000            | CM        | 1+        | 20  | 2+        | 40  |
| 10  | CM012      | 200,382              | CM        | -         | 0   | 2+        | 30  |
| 11  | CM013      | 25,000               | CM        | -         | 0   | 2+        | 30  |
| 12  | CM014      | 34,985.90            | CM        | -         | 0   | 2+        | 33  |
| 13  | CM016      | 187,479.50           | CM        | -         | 0   | 2+        | 20  |
| 14  | CM017      | NA                   | CM        | 1+        | 20  | 2+        | 20  |
| 15  | CM018      | NA                   | CM        | -         | 0   | 1+        | 30  |
| 16  | CM019      | NA                   | CM        | -         | 0   | 2+        | 100 |
| 17  | CM020      | NA                   | CM        | -         | 0   | 2+        | 30  |
| 18  | PM002      | 184,108.50           | CM        | 3+        | 20  | 2+        | 50  |
| 19  | PM003      | 181,113.20           | CM        | 2+        | 50  | 2+        | 40  |
| 20  | PM005      | NA                   | CM        | 1+        | 10  | 2+        | 30  |
| 21  | PM006      | NA                   | CM        | 1+        | 10  | 1+        | 10  |
| 22  | PM007      | 400,000              | CM        | 1+        | 30  | 2+        | 20  |
| 23  | PM011      | NA                   | CM        | -         | 0   | 2+        | 10  |
| 24  | PM012      | 79,677               | CM        | -         | 0   | 2+        | 30  |
| 25  | PM014      | 89,116               | CM        | 2+        | 80  | 2+        | 10  |
| 26  | PM015      | 131,942              | CM        | -         | 0   | 2+        | 40  |
| 27  | PM016      | 79,284               | CM        | -         | 0   | 2+        | 30  |
| 28  | PM021      | NA                   | CM        | -         | 0   | 2+        | 10  |
| 29  | PM022      | NA                   | CM        | -         | 0   | 2+        | 60  |
| 30  | PM008      | 9,515.40             | PM        | 3+        | 30  | 2+        | 100 |
| 31  | PM009      | 33,906               | PM        | 3+        | 50  | 2+        | 100 |
| 32  | PM010      | NA                   | PM        | 2+        | 70  | 2+        | 100 |
| 33  | PM017      | NA                   | PM        | 2+        | 60  | 2+        | 100 |
| 34  | PM018      | NA                   | PM        | 3+        | 50  | 2+        | 100 |
| 35  | PM020      | 11,764               | PM        | 2+        | 60  | 2+        | 100 |
| 36  | PM024      | NA                   | PM        | 3+        | 20  | 2+        | 100 |
| 37  | PM025      | NA                   | PM        | 3+        | 20  | 2+        | 100 |
| 38  | PM026      | NA                   | PM        | 3+        | 30  | 2+        | 100 |
| 39  | PM033      | 113,354              | PM        | 2+        | 60  | 2+        | 100 |

|           |        |           |     |    |     |    |     |
|-----------|--------|-----------|-----|----|-----|----|-----|
| <b>40</b> | PM036  | 369,109   | PM  | 3+ | 10  | 2+ | 100 |
| <b>41</b> | PM037  | 123,040   | PM  | 3+ | 50  | 2+ | 100 |
| <b>42</b> | PM038  | 321,637   | PM  | 3+ | 50  | 2+ | 100 |
| <b>43</b> | PM040  | 13,298    | PM  | 2+ | 70  | 2+ | 100 |
| <b>44</b> | POC011 | 19,132.60 | PM  | 2+ | 60  | 2+ | 100 |
| <b>45</b> | POC001 | NA        | NMA | 3+ | 100 | 2+ | 100 |
| <b>46</b> | POC002 | NA        | NMA | 3+ | 80  | 2+ | 100 |
| <b>47</b> | POC003 | NA        | NMA | 3+ | 100 | 2+ | 100 |
| <b>48</b> | POC004 | NA        | NMA | 3+ | 100 | 2+ | 100 |
| <b>49</b> | POC005 | NA        | NMA | 3+ | 100 | 2+ | 100 |
| <b>50</b> | POC006 | NA        | NMA | 2+ | 50  | 2+ | 100 |
| <b>51</b> | POC007 | NA        | NMA | 3+ | 20  | 2+ | 100 |
| <b>52</b> | POC008 | NA        | NMA | 3+ | 30  | 1+ | 10  |
| <b>53</b> | POC009 | NA        | NMA | 3+ | 90  | 2+ | 100 |
| <b>54</b> | POC010 | NA        | NMA | 3+ | 90  | 2+ | 100 |
| <b>55</b> | POC012 | NA        | NMA | 2+ | 30  | 2+ | 100 |
| <b>56</b> | CM002  | 14,604.40 | NMA | 1+ | 100 | 2+ | 100 |
| <b>57</b> | PM013  | NA        | NMA | 2+ | 80  | 2+ | 100 |
| <b>58</b> | PM019  | NA        | NMA | 3+ | 40  | 2+ | 100 |
| <b>59</b> | PM023  | < 1.2     | NMA | 3+ | 80  | 2+ | 100 |
| <b>60</b> | PM027  | 25,888    | NMA | 3+ | 70  | 2+ | 100 |
| <b>61</b> | PM028  | < 1.2     | NMA | 3+ | 70  | 2+ | 100 |

CM – Complete mole, PM – Partial mole, NMA – Non-molar abortus, NA – Not available
